# Supplementary material
Source: Springer Nature journal article supplement (https://www.springermedizin.de/resource/supplementary/13058_2013_3376_MOESM4_ESM.pdf/9703992)

**A**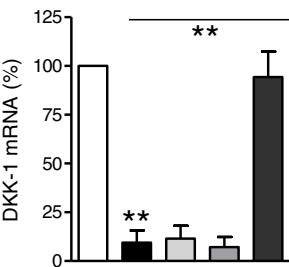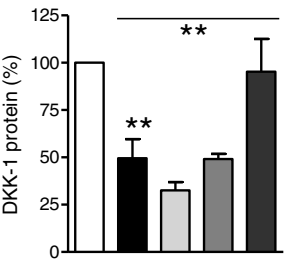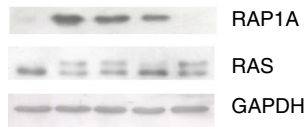

|   |   |   |   |   |      |
|---|---|---|---|---|------|
| - | + | + | + | + | ZOL  |
| - | - | + | - | - | MEV  |
| - | - | - | + | - | FPP  |
| - | - | - | - | + | GGPP |

**B**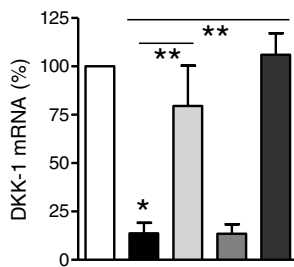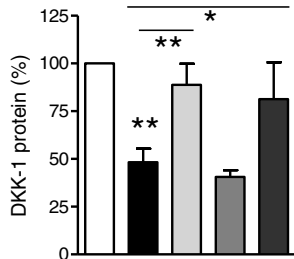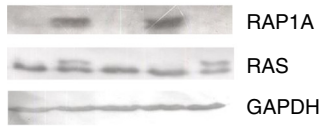

|   |   |   |   |   |      |
|---|---|---|---|---|------|
| - | + | + | + | + | ATO  |
| - | - | + | - | - | MEV  |
| - | - | - | + | - | FPP  |
| - | - | - | - | + | GGPP |

**C**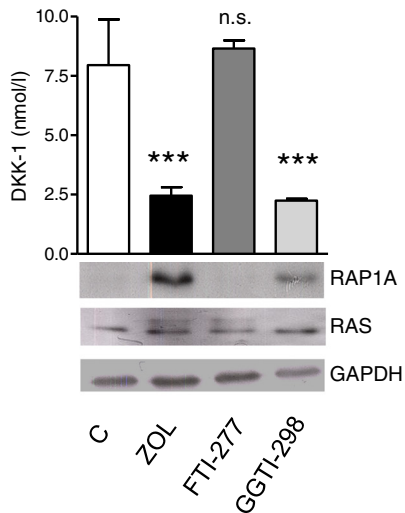**D**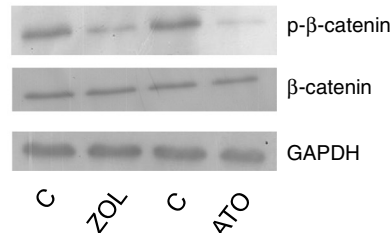

Supplement: MOESM4 [file 9703992]
